# Supplementary material
Source: MDPI journal article supplement (https://www.mdpi.com/2305-6320/5/1/17)
Supplement: s1 [file s1]

# Supplementary Materials: Understanding Chinese Medicine Patterns of Rheumatoid Arthritis and Related Biomarkers

Susana Seca and Giovanna Franconi

Table S1. Study Assessments – Qualitative Studies.

| Ref.                         | Aims clearly stated? | Qualitative method appropriate? | Design appropriate to address aims? | Recruitment strategy appropriate? | Data collected so as to address research issue? | Relationship between researcher & participants adequately considered? | Ethical issues considered? | Data analysis sufficiently rigorous? | Findings clearly stated? | Overall quality rating? |
|------------------------------|----------------------|---------------------------------|-------------------------------------|-----------------------------------|-------------------------------------------------|-----------------------------------------------------------------------|----------------------------|--------------------------------------|--------------------------|-------------------------|
| Lu et al. [7]                | Yes                  | Yes                             | Yes                                 | Yes                               | Yes                                             | No                                                                    | Yes                        | Yes                                  | Yes                      | Strong                  |
| Chen et al. [8]              | Yes                  | Yes                             | Yes                                 | Yes                               | Yes                                             | No                                                                    | Yes                        | Yes                                  | No                       | Moderate                |
| Lu et al. [9]                | Yes                  | Yes                             | Yes                                 | Yes                               | Yes                                             | No                                                                    | Yes                        | Yes                                  | Yes                      | Strong                  |
| Gu et al. [10]               | Yes                  | Yes                             | Yes                                 | Yes                               | Yes                                             | No                                                                    | Yes                        | Yes                                  | Yes                      | Strong                  |
| Van Wietmarschen et al. [11] | Yes                  | Yes                             | Yes                                 | Yes                               | Yes                                             | No                                                                    | Yes                        | Yes                                  | Yes                      | Strong                  |
| Wang et al. [12]             | Yes                  | Yes                             | Yes                                 | Yes                               | Yes                                             | No                                                                    | Yes                        | Yes                                  | Yes                      | Strong                  |
| Wang et al. [13]             | Yes                  | Yes                             | Yes                                 | Yes                               | Yes                                             | No                                                                    | Yes                        | Yes                                  | No                       | Moderate                |
| Sun et al. [14]              | Yes                  | Yes                             | Yes                                 | Yes                               | Yes                                             | Can't tell                                                            | Yes                        | Yes                                  | Yes                      | Strong                  |

**Table S2.** Study assessments –quantitative studies and not qualitative studies.

| Ref.                       | Did study address a clearly focused issue? | Cohort/sample recruited in an acceptable way? | Exposure accurately measured to minimise bias? | Outcomes accurately measured to minimise bias | Have authors identified important confounding factors? | Have authors accounted for confounding factors in designs and/or analysis? | Was follow up of participants long enough? | Do you believe the results? | Can results more widely applied? | Overall quality rating? |
|----------------------------|--------------------------------------------|-----------------------------------------------|------------------------------------------------|-----------------------------------------------|--------------------------------------------------------|----------------------------------------------------------------------------|--------------------------------------------|-----------------------------|----------------------------------|-------------------------|
| Jiang et al. <sup>15</sup> | Yes                                        | Yes                                           | No                                             | Yes                                           | Can't tell                                             | No                                                                         | Yes                                        | Yes                         | Yes                              | Moderate                |
| Cheng et al. <sup>16</sup> | Yes                                        | Yes                                           | Can't tell                                     | Can't tell                                    | No                                                     | No                                                                         | No                                         | Yes                         | Can't tell                       | Weak                    |
